# Supplementary material for: Homopolymerization and copolymerization of ε-caprolactone and l -lactide organocatalyzed by carboxylic acids with mono-, di-, and tri-functionality
Source: Royal Society of Chemistry journal article supplement (doi:10.1039/d5ra07333b), 2025-01-01

## Supplementary Information

---

### **Homopolymerization and copolymerization of $\epsilon$ -caprolactone and L-lactide organocatalyzed by carboxylic acids with mono-, di-, and tri-functionality**

Juan Pablo Aldaba-Ramos,<sup>a</sup> Miriam P. Barrera-Nava,<sup>a</sup> José Bonilla-Cruz,<sup>b</sup> Alejandro Aparicio-Saguilán,<sup>c</sup> Aurelio Ramírez-Hernández,<sup>c</sup> and José E. Báez <sup>\*a</sup>

<sup>a</sup>Department of Chemistry, University of Guanajuato (UG), Noria Alta S/N, 36050 Guanajuato, Gto, Mexico.

<sup>b</sup>Advanced Functional Materials & Nanotechnology Group, Centro de Investigación en Materiales Avanzados S. C. (CIMAV-Unidad Monterrey), Av. Alianza Norte 202, Autopista Monterrey-Aeropuerto Km 10, PIIT, Apodaca-Nuevo León 66628 C.P., Mexico.

<sup>c</sup>Instituto de Química Aplicada, Universidad del Papaloapan, Circuito Central 200 Parque Industrial, San Juan Bautista Tuxtepec, C.P. 68301 Oaxaca, Mexico.

---

\*Correspondence to: Prof. José E. Báez. Email: [jebaez@ugto.mx](mailto:jebaez@ugto.mx)

## Table of contents

|                                                                                                                                                                                                                                              | Page |
|----------------------------------------------------------------------------------------------------------------------------------------------------------------------------------------------------------------------------------------------|------|
| <b>Tables</b>                                                                                                                                                                                                                                |      |
| <b>Table S1.</b> Thermic properties of $\alpha$ -hydroxyl- $\omega$ -docosyl-PCL with different organocatalysts.                                                                                                                             | 3    |
| <b>Table S2.</b> Thermic properties of PCL and copolymers PCL-co-PLLA using citric acid <b>7</b> as organocatalyst.                                                                                                                          | 4    |
| <b>Figures</b>                                                                                                                                                                                                                               |      |
| <b>Figure S1.</b> $^{13}\text{C}$ NMR spectrum (125 MHz) of $\alpha$ -hydroxyl- $\omega$ -docosyl-PCL (citric acid as organocatalyst, 100 min, 150 °C) in $\text{CDCl}_3$ at room temperature.                                               | 5    |
| <b>Figure S2.</b> Semi-logarithmic plot of the first-order behavior for the ROP reaction of CL, $\text{Sn}(\text{Oct})_2$ (black line), and <b>7</b> (red line).                                                                             | 6    |
| <b>Figure S3.</b> Graphs of the dependence of $M_n$ on the conversion percentage for the four most active organocatalysts: (a) citric acid <b>7</b> , (b) fumaric acid <b>5</b> , (c) malic acid <b>6</b> , and (d) succinic acid <b>4</b> . | 7    |
| <b>Figure S4.</b> Expansion of the $^{13}\text{C}$ NMR spectrum (125 MHz) in the carbonyl carbon region of the PCL-co-PLLA copolymer (Table 3, Entry 6) and the triad assignments.                                                           | 8    |
| <b>Figure S5.</b> FT-IR spectra of a) PCL, PCL-co-PLLA with CL/L-LA feed b) (90-10), c) (70-30), d) (50-50) and e) PLLA.                                                                                                                     | 9    |
| <b>Scheme</b>                                                                                                                                                                                                                                |      |
| <b>Scheme S1.</b> Chemical structure of PCL initiated by $\text{H}_2\text{O}$ and detected by MALDI-TOF.                                                                                                                                     | 10   |

**Table S1.** Thermic properties of  $\alpha$ -hydroxyl- $\omega$ -docosyl-PCL with different organocatalysts <sup>a</sup>.

| Organocatalyst | $M_n(\text{NMR})^b$ | Conv.(%) <sup>b</sup> | $T_m$ (°C) <sup>c</sup> | $\Delta H_m$ (J/g) <sup>c</sup> | $\Delta H_{m\text{PCL}}$ (J/g) <sup>d</sup> | $x_i$ (%) <sup>e</sup> |
|----------------|---------------------|-----------------------|-------------------------|---------------------------------|---------------------------------------------|------------------------|
| 1              | 650                 | 45                    | 45                      | 116                             | 57                                          | 42                     |
| 2              | 1090                | 88                    | 45                      | 114                             | 80                                          | 59                     |
| 3              | 1080                | 85                    | 45                      | 112                             | 78                                          | 57                     |
| 4              | 1380                | >98                   | 46                      | 111                             | 83                                          | 61                     |
| 5              | 1230                | >98                   | 46                      | 114                             | 84                                          | 62                     |
| 6              | 1260                | >98                   | 48                      | 114                             | 85                                          | 63                     |
| 7              | 1320                | >98                   | 47                      | 113                             | 85                                          | 63                     |

<sup>a</sup>ROP of  $\epsilon$ -CL with 1-docosanol as initiator at 150°C, ratio  $[M]_0/[I]_0/[Cat]_0 = 100 : 10 : 1$  (mmolar ratio= 10 : 1 : 0.1).

<sup>b</sup>Obtained by <sup>1</sup>H NMR analysis.

<sup>c</sup>Obtained by DSC analysis, second heating.

<sup>d</sup>Obtained by the equation  $\Delta H_{m\text{PCL}} = (\Delta H_m) \cdot (\text{weight fraction of PCL})$ .

<sup>e</sup>Using the value of 135.3 J/g for a PCL 100% crystalline, the crystallinity of PCL ( $x_{\text{PCL}}$ ) was calculated.

**Table S2.** Thermic properties of PCL and copolymers PCL-co-PLLA using citric acid **7** as organocatalyst<sup>a</sup>.

| Entry | Composition (%) |      | $T_m$ (°C) <sup>b</sup> | $\Delta H_m$ (J/g) <sup>b</sup> | $\Delta H_{mPCL}$ (J/g) <sup>c</sup> | $x_i$ (%) <sup>d</sup> |
|-------|-----------------|------|-------------------------|---------------------------------|--------------------------------------|------------------------|
|       | CL              | L-LA |                         |                                 |                                      |                        |
| 1     | 100             | 0    | 46                      | 113                             | 113                                  | 83                     |
| 2     | 97              | 3    | 46                      | 97                              | 94                                   | 69                     |
| 3     | 95              | 5    | 40                      | 85                              | 80                                   | 59                     |
| 4     | 89              | 11   | 40                      | 83                              | 73                                   | 54                     |
| 5     | 82              | 18   | 42                      | 70                              | 57                                   | 42                     |
| 6     | 72              | 28   | 43                      | 62                              | 44                                   | 32                     |
| 7     | 63              | 37   | 44                      | 56                              | 35                                   | 25                     |

<sup>a</sup>ROP in bulk.  $[M]_0/[I]_0/[Cat]_0 = 100/10/1$ .  $[M]_0 = 10$  mmol,  $T = 150$  °C,  $t = 24$  h.<sup>b</sup>Obtained by DSC analysis, second heating.<sup>c</sup>Obtained by the equation  $\Delta H_{mPCL} = (\Delta H_m) \cdot (\text{weight fraction of PCL})$ .<sup>d</sup>Using the value of 135.3 J/g for a PCL 100% crystalline, the crystallinity of PCL ( $x_{PCL}$ ) was calculated.

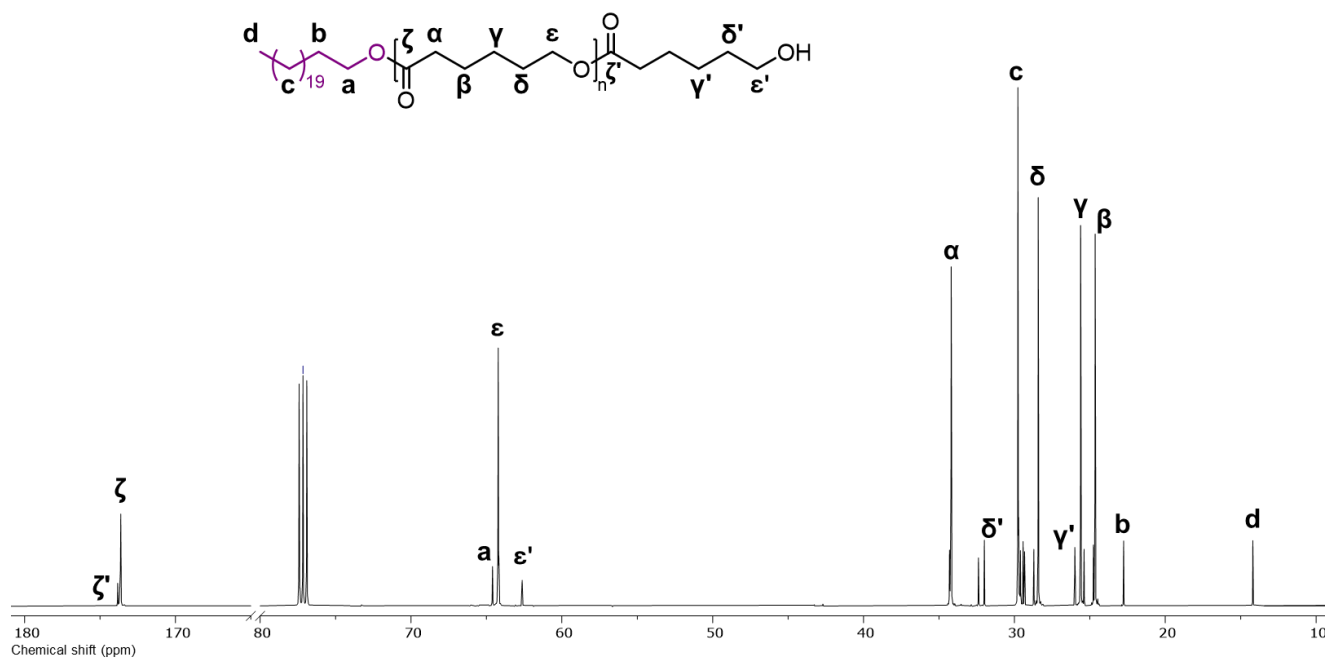

**Figure S1.**  $^{13}\text{C}$  NMR spectrum (125 MHz) of  $\alpha$ -hydroxyl- $\omega$ -docosyl-PCL (citric acid as organocatalyst, 100 min, 150 °C) in  $\text{CDCl}_3$  at room temperature.

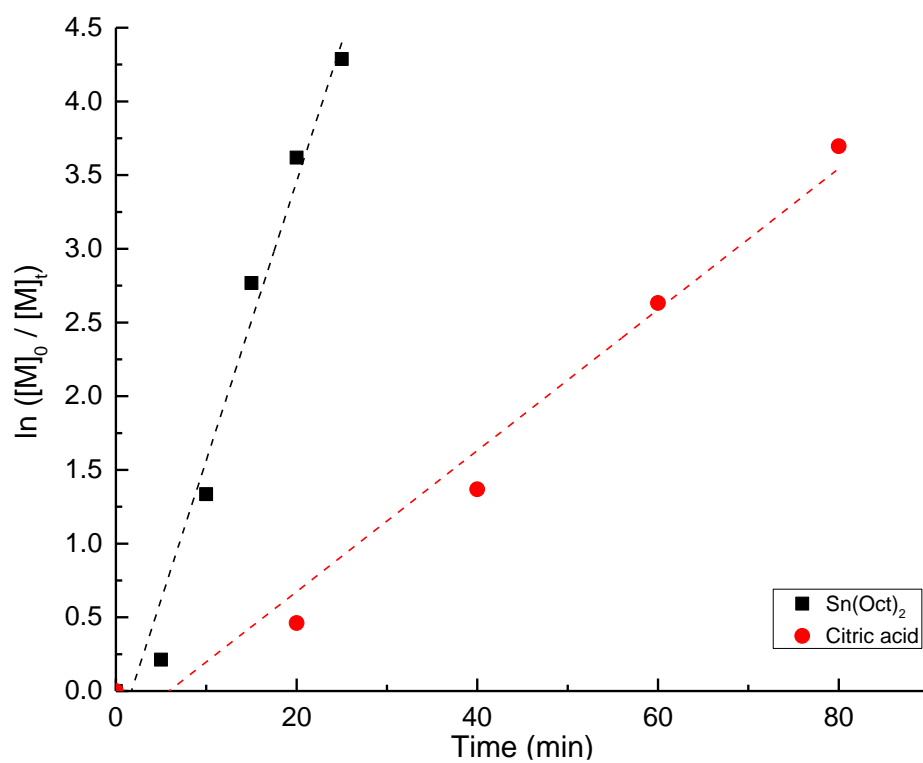

**Figure S2.** Semi-logarithmic plot of the first-order behavior for the ROP reaction of CL,  $\text{Sn}(\text{Oct})_2$  (black line), and **7** (red line).

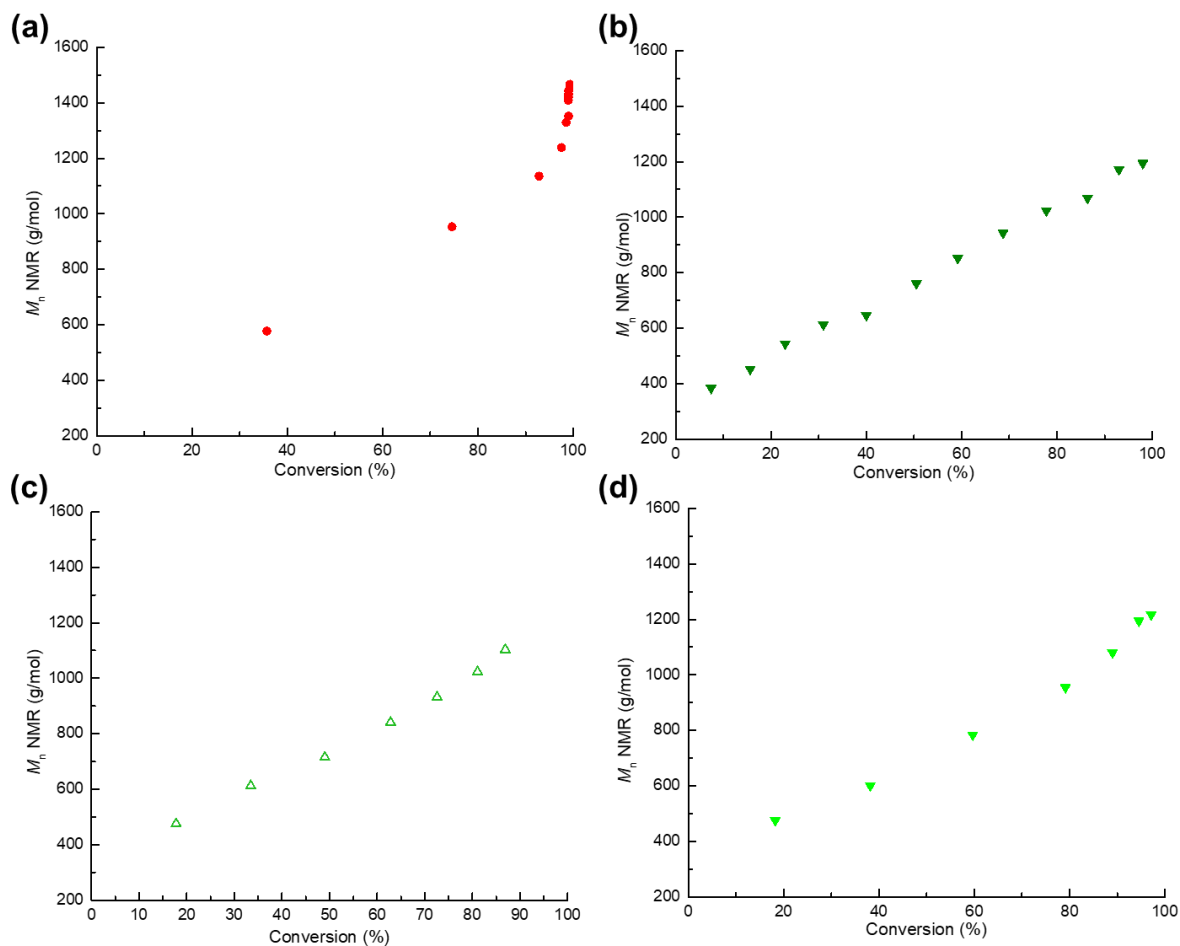

**Figure S3.** Graphs of the dependence of  $M_n$  on the conversion percentage for the four most active organocatalysts: (a) citric acid **7**, (b) fumaric acid **5**, (c) malic acid **6**, and (d) succinic acid **4**.

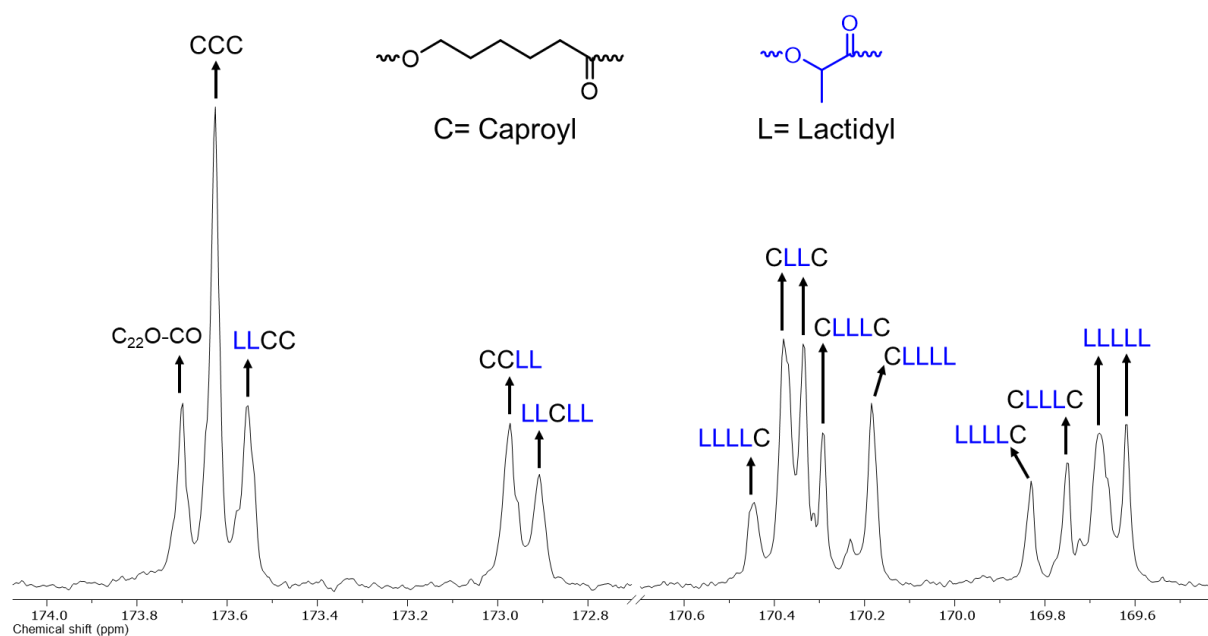

**Figure S4.** Expansion of the  $^{13}\text{C}$  NMR spectrum (125 MHz) in the carbonyl carbon region of the PCL-co-PLLA copolymer (Table 3, Entry 6) and the triad assignments (acquisition time=18 h).



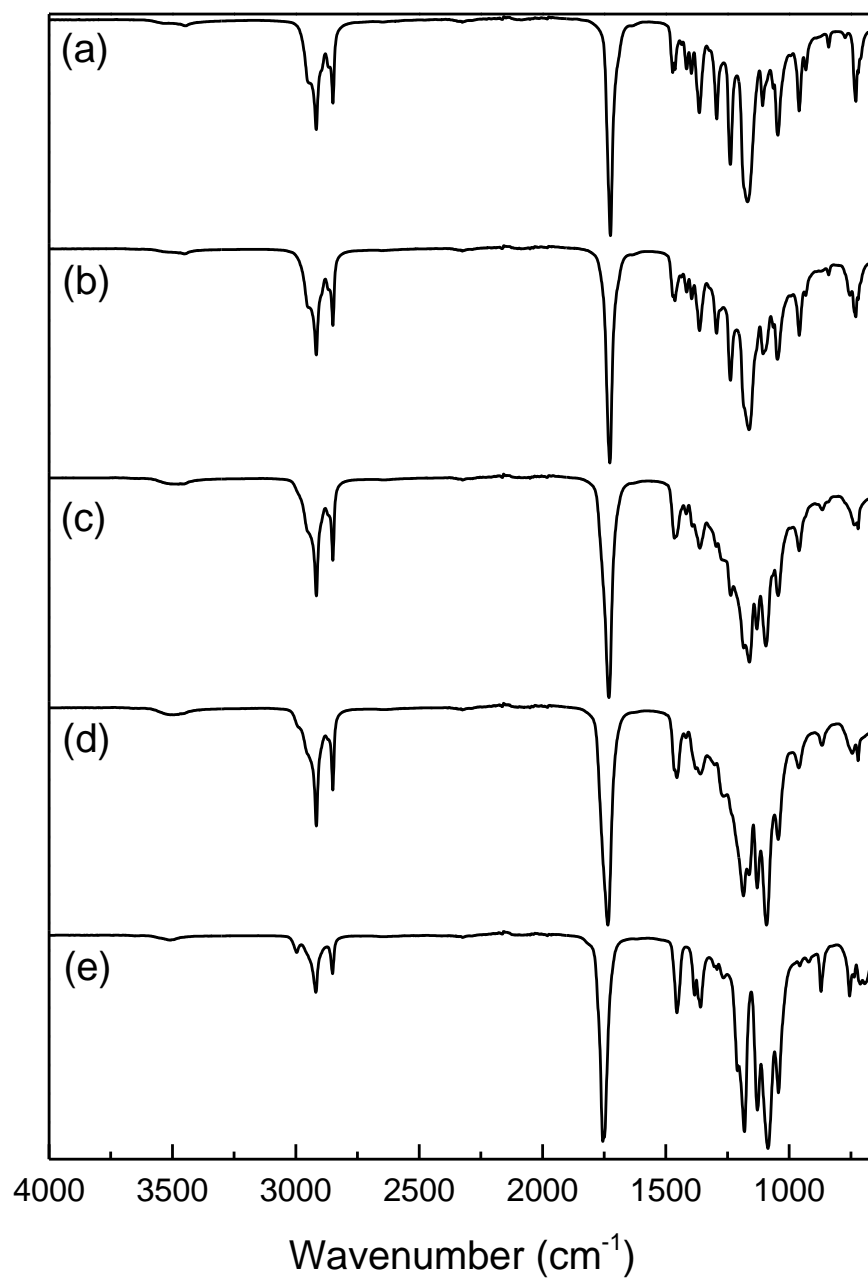

**Figure S5.** FT-IR spectra of a) PCL, PCL-co-PLLA with CL/L-LA feed b) (90-10), c) (70-30), d) (50-50) and e) PLLA.

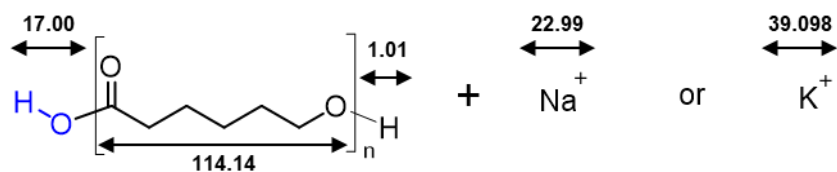

**Scheme S1.** Chemical structure of PCL initiated by H<sub>2</sub>O and detected by MALDI-TOF.

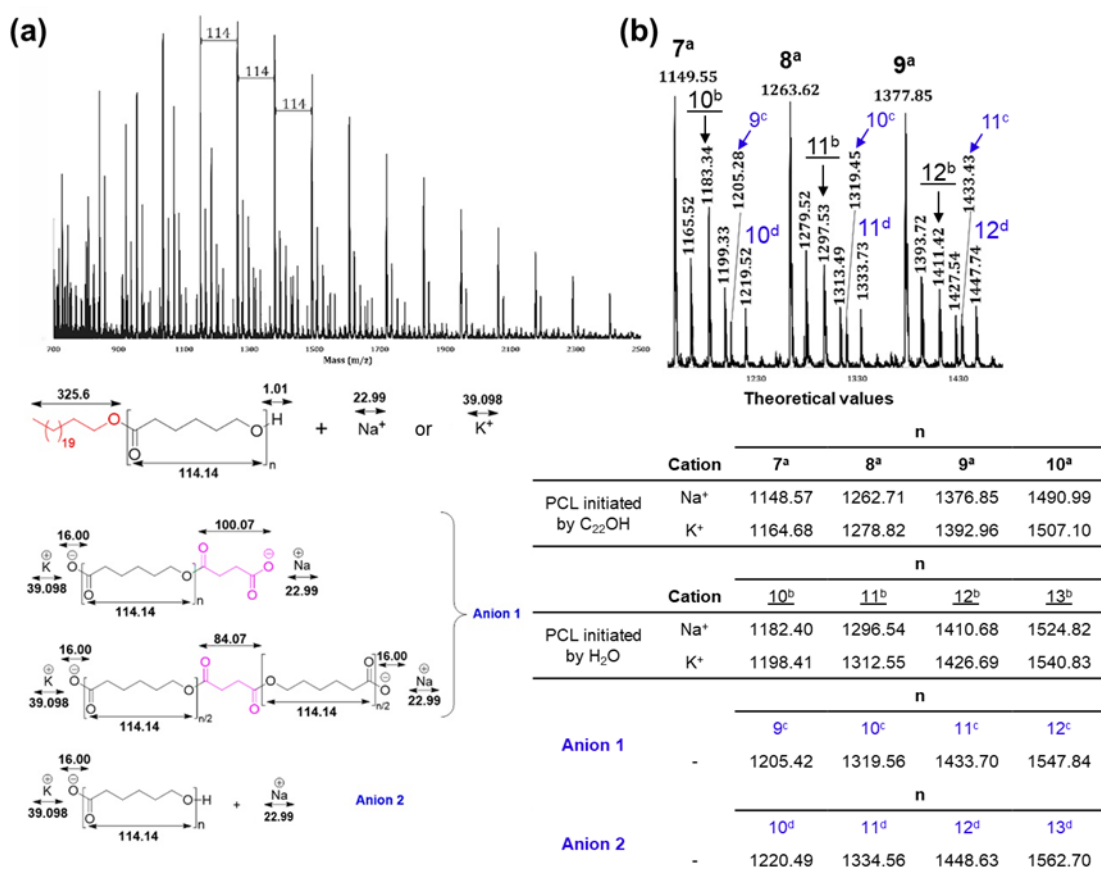

Supplement: d5ra07333b1.pdf [file d5ra07333b1.pdf]
